# Supplementary figures and images for: Eating Dinner Early Improves 24-h Blood Glucose Levels and Boosts Lipid Metabolism after Breakfast the Next Day: A Randomized Cross-Over Trial
Source: MDPI journal article supplement (doi:10.3390/nu13072424), 2021-07-15

**Supplemental Figure S1.** Protocols for the meal timing interventions.

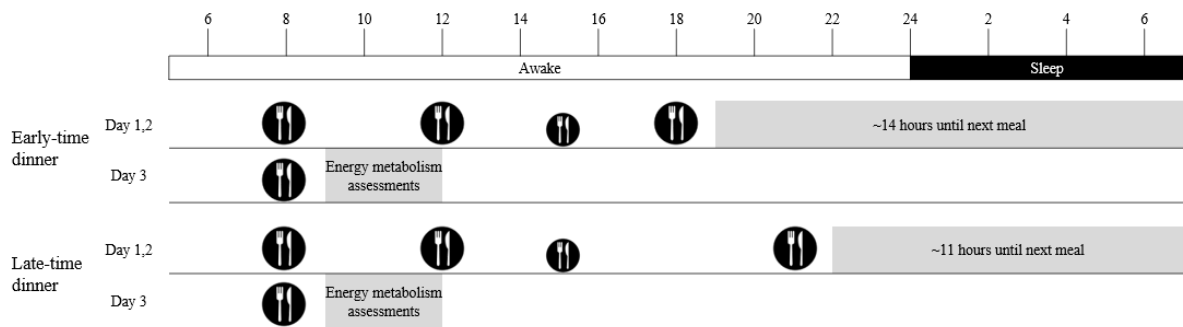

Supplement: s1 [file s1]
